1 **Identification of therapeutic targets for 18 clinical diseases by integrating human**  
2 **plasma proteome with genome**

3 Shifang Li, Meijiao Gong

4 Laboratory of Immunology and Vaccinology, FARAH, ULiège, Liège 4000, Belgium.

5 Correspondence:

6 Shifang Li, [fruceslee@gmail.com](mailto:fruceslee@gmail.com)

7 Laboratory of Immunology and Vaccinology, FARAH, ULiège, Liège 4000, Belgium

8 **Abstract**

9 The proteome is an abundant source of potential therapeutic targets, and  
10 a comprehensive evaluation of proteins as therapeutic targets for a wide range of  
11 diseases is required. By screening 4,907 plasma proteins, we conducted a  
12 systematically two-sample proteome-wide Mendelian randomisation (MR) study to  
13 uncover potential therapeutic targets for 18 clinical diseases. Following MR analysis  
14 and stringent process filtering, a total of 146 causative plasma proteins (false  
15 discovery rate<0.05) were discovered. Colocalization analysis (Posterior Probability  
16  $H_4 > 0.8$ ) further supported the causality of three proteins (MAP2K1, GFRA1, and  
17 THBS3) in gastroesophageal reflux disease; LYPLAL1 in keratoconus; three proteins  
18 (PCSK9, ANGPTL4, and GCKR) in familial hyperlipidemia; CRAT in atopic eczema;  
19 three proteins (IRF3, CA12, and TNFRSF1B) in hypothyroidism; AIF1 in age-related  
20 hearing impairment; SCARF2 in male pattern baldness; IRF3 in basal cell carcinoma;  
21 and four proteins (RPS6KA1, ULK3, MPPED2, and BTN3A1) in prostate cancer.  
22 Interestingly, having a genetically higher circulating CA12 level is associated with a  
23 lower risk of hypothyroidism (OR=0.47,  $p$ -value=1.68e-05, Posterior Probability  
24  $H_4 = 0.82$ ). Single-cell RNA sequencing analysis showed that CA12 was mainly  
25 expressed in fibroblasts and epithelial cells in patient thyroid tissue and that its  
26 expression increased in older adults. Furthermore, with a proportion of 3.8%,  
27 hypothyroidism appears to mediate the effect of IRF3 on idiopathic pulmonary  
28 fibrosis, according to mediation analysis. Overall, our research could provide new  
29 insights into the etiology of clinical diseases as well as intriguing targets for the

30 **NOTE: This preprint reports new research that has not been certified by peer review and should not be used to guide clinical practice.**  
development of screening biomarkers and therapeutic treatments.

## 31 **Introduction**

32 Plasma proteins are involved in numerous essential physiological processes, such  
33 as immunomodulation, substance transport, signaling, and homeostasis maintenance,  
34 and their dysregulation has been frequently reported in a variety of diseases, implying  
35 that these dysregulated proteins are involved in disease pathogenesis [1-2]. Given the  
36 importance of plasma proteins in disease and the fact that plasma proteins are a  
37 primary source of therapeutic targets, identifying disease-related plasma proteins can  
38 assist in deciphering disease pathophysiology and providing possible molecular  
39 targets for drug development [3-4]. Currently, large-scale proteomics study have  
40 uncovered over 18,000 protein quantitative trait loci (pQTLs) spanning over 4,800  
41 proteins, including over 1,800 independent *cis*-pQTLs [5]. Through Mendelian  
42 randomisation (MR), these studies provide a significant data resource for  
43 systematically understanding the causal impact of plasma proteins on clinical  
44 disease. Normally, MR employs naturally randomized genetic diversity at the moment  
45 of conception as a natural experiment to uncover the causal relationship between  
46 exposure and disease, reducing the risk of reverse causation and confounding bias [6].  
47 Proteome-wide MR has currently revealed important insights into the etiology of  
48 stroke, idiopathic pulmonary fibrosis (IPF), and COVID-19, as well as the  
49 prioritization of therapeutic targets [7-9]. Indeed, drugs containing human genetic  
50 evidence are more likely to succeed in Phase II and Phase III trials, with human  
51 genetic data supporting two-thirds of FDA-approved drugs in 2021 [10-12].

52 In this study, we utilized proteome-wide MR to identify circulating protein  
53 biomarkers linked with 18 clinical traits by integrating the human plasma proteome  
54 with genetic data. Colocalization analyses are conducted to determine the robustness  
55 of the proteins' instrumental variables. Furthermore, we performed single-cell  
56 sequencing data analysis and mediation analysis to identify the enriched cell types of  
57 candidate proteins in tissues as well as the potential mechanisms mediated between  
58 diseases, respectively.

## 59 **Methods**

### 60 **Proteomic data source**

61 A large-scale protein quantitative trait loci (pQTL) study in 35,559 Icelanders  
62 yielded the largest and most thorough genome-wide association studies (GWAS)  
63 summary datasets on 4,907 circulating proteins [5]. The detailed description of the  
64 datasets can be found in the original study [5]. In brief, the plasma protein levels were  
65 determined using the SomaScan version 4 assay from SomaLogic, and the pQTL  
66 datasets were made up of associations between genome-wide genetic variations and  
67 plasma proteins that were adjusted for age and gender using the BOLT-LMM linear  
68 mixed model. As instrumental variables in the following MR analysis, genome-wide  
69 significant and independent single nucleotide polymorphisms (SNPs) with  
70  $p\text{-value} < 5e-08$  and  $r^2 < 0.001$  of pQTLs were employed.

### 71 **18 clinical traits data sources**

72 To identify the potential therapeutic targets, the GWAS summary statistics from  
73 18 diseases, including male pattern baldness (ID: GCST006661, 36,166 cases and  
74 16,708 controls), gastroesophageal reflux disease (71,522 cases and 261,079 controls),  
75 keratoconus (ID: GCST90013442, 2,116 cases and 24,626 controls), selective IgA  
76 deficiency disease (ID: GCST003814, 1,635 cases and 4,852 controls), fibromuscular  
77 dysplasia (ID: GCST90026612, 1,556 cases and 7,100 controls), age-related hearing  
78 impairment (ID: GCST90012115, 125,688 cases and 205,071 controls), familial  
79 hyperlipidemia (ID: GCST90104003, 3,838 cases and 345,384 controls), atopic  
80 eczema (ID: GCST90027161, 22,474 cases and 774,187 controls), Brugada syndrome  
81 (ID: GCST90086158, 2,820 cases and 10,001 controls), cataract (ID: GCST009963,  
82 21,679 cases and 387,283 controls), uterine fibroid (ID: GCST009158, 20,406 cases  
83 and 223,918 controls), amyotrophic lateral sclerosis (ID: GCST90027164, 27,205  
84 cases and 110,881 controls), acne (ID: GCST90245818, 34,422 cases and 364,991  
85 controls), posterior urethral valve (ID: GCST90134327, 756 cases and 4,823 controls),  
86 hypothyroidism (ID: GCST90204167, 51,194 cases and 443,383 controls), prostate  
87 cancer (ID: GCST90274714, 122,188 cases and 604,640 controls), basal cell  
88 carcinoma (ID: GCST90013410, 17,416 cases and 375,455 controls), and unipolar  
89 depression (ID: GCST006477, 66,809 individuals) were retrieved from the GWAS  
90 Catalog (<https://www.ebi.ac.uk/gwas/>) when an ID was provided (**Supplementary**

91 **Table 1**). To the best of our knowledge, the exposure sample dataset (4,907 proteomic  
92 data) did not overlap with the outcome (18 clinical traits) we selected. Further  
93 information on the outcome dataset is listed in **Supplementary Table 1**. If standard  
94 error and effect size are missing but z-scores are included in the GWAS summary  
95 statistics file, effect size and standard error can be calculated as follows:

$$\text{effect size} = \frac{z}{\sqrt{2 * p(1 - p) * (n + z^2)}}$$
$$\text{standard error} = \frac{1}{\sqrt{2 * p(1 - p) * (n + z^2)}}$$

96 where n is the number of individuals used in the association study and p is the  
97 p-value for the association study.

### 98 **Mendelian randomisation analysis**

99 Based on the presence of non-overlapping samples between exposure (4,907  
100 proteome data) and outcome (18 clinical traits), two-sample MR analysis has been  
101 performed using the TwoSampleMR, as previously described [13-14]. In brief, the  
102 data were harmonized after clumping ( $r^2 < 0.001$ ) to exclude ambiguous SNPs with  
103 non-concordant alleles and palindromic SNPs. Following that, the Wald ratio method  
104 was used to generate effect estimates when considering a plasma protein instrumented  
105 by a single SNP, and the Inverse Variance Weighted (IVW) method was employed for  
106 proteins instrumented by two or more SNPs, followed by heterogeneity analysis. To  
107 test the consistency of the associations, additional methods such as simple mode,  
108 weighted mode, weighted median, and MR-Egger were applied. The MR-Egger  
109 intercept test was used to detect probable unbalanced pleiotropy (horizontal  
110 pleiotropy). The PhenoScanner (<http://www.phenoscaner.medschl.cam.ac.uk/>)  
111 databases were utilized to investigate whether variants had possible pleiotropic  
112 associations with other diseases or traits when fewer than three genetic instrumental  
113 factors were employed in MR analysis. Associations with  $p\text{-value} < 5e-08$  were  
114 deemed significant. In a heterogeneity test, we calculated  $I^2$  statistics with the "Isq()"  
115 function and heterogeneity p-value with the "mr\_heterogeneity()" function; results  
116 with an  $I^2 > 50\%$  and a heterogeneity p-value ( $Q\text{-pval} < 0.05$ ) were considered

117 heterogeneous (substantial heterogeneity) [8]. The F-statistic was calculated to  
118 quantify instrument strength, and an F-statistic greater than 10 indicated an adequately  
119 powerful instrument. To account for multiple tests, the Benjamini-Hochberg  
120 correction, which governs the false discovery rate (FDR), was implemented. The  
121 association with a  $p$ -value of 0.05 but a Benjamini-Hochberg adjusted  $p$ -value greater  
122 than 0.05 was considered nominally significant, while the association with a  
123 Benjamini-Hochberg adjusted  $p$ -value greater than 0.05 was considered significant.  
124 Furthermore, the Steiger filtering approach was used to verify the validity of the  
125 causal direction between the hypothesized exposure and outcomes using the  
126 `directionality_test()` function in the "TwoSampleMR" package [14]. In addition, we  
127 performed a leave-one-out analysis to examine whether the MR estimates could be  
128 explained by a single SNP (removing estimates where all but one leave-one-out  
129 configuration had a  $p$ -value<0.05). Only MR results that met all of the following  
130 criteria were chosen to avoid complex causation relationships: (1) MR-Egger  
131 regression revealed no pleiotropy ( $p$ -value>0.05); (2) true causal direction and Steiger  
132  $p$ -value<0.05; (3) heterogeneity test  $I^2$ <0.5; (4) leave-one-out analysis MR  
133  $p$ -value<0.05 after removing outliers; and (5) FDR<0.05.

### 134 **Colocalization Analysis**

135 Colocalization analysis was executed to figure out whether the protein and  
136 diseases shared the same causative genetic variations and to rule out confounding  
137 owing to linkage disequilibrium (LD). This was performed using the "coloc" R  
138 package [15]. The following five mutually exclusive hypotheses were tested: (1)  
139 Neither protein nor disease has a causal SNP ( $H_0$ ); (2) only protein has a causal SNP  
140 ( $H_1$ ); (3) only disease has a causal SNP ( $H_2$ ); (4) both protein and disease have a  
141 causal SNP, but the two causal SNPs differ ( $H_3$ ); and (5) both protein and disease  
142 have a causal SNP and share the same SNP ( $H_4$ ). To measure the support for each  
143 hypothesis, the posterior probability was adopted. A posterior probability for  $H_4$  ( $PH_4$ )  
144 of more than 80% was regarded as significant evidence of colocalization.

### 145 **Single-cell RNA sequencing analysis**

146 Single-cell RNA-sequencing of 54,762 cells taken from normal thyroid tissue

147 from 7 individuals who had thyroidectomy and had verified instances of differentiated  
148 thyroid carcinoma were retrieved from Gene Expression Omnibus  
149 (<https://www.ncbi.nlm.nih.gov/geo/>, GSE182416) [16]. Seurat 4.2.0 was used for  
150 processing and analyzing the single-cell dataset, as previously stated [13]. In short,  
151 low-quality cells by selecting feature numbers ranging from 200 to 3,000 were  
152 excluded. The data were normalized using the "LogNormalize" method using the  
153 "NormalizeData" function. The "vst" selection method in the "FindVariableFeatures"  
154 function yielded a total of 2,000 highly variable genes for each sample. The  
155 "FindIntegrationAnchors" function was utilized to correct the batch effect and merged  
156 the 7 patients for further analysis. The k-nearest neighbors were determined using  
157 principal component analysis (PCA). For data visualization, the dimension reduction  
158 approach UMAP (Uniform Manifold Approximation and Projection) was utilized.  
159 Cell type annotation was carried out in their study based on the specific gene  
160 expression [16].

### 161 **Mediation analysis**

162 The product of coefficients approach was employed to quantify the impacts of  
163 proteins on IPF outcomes via hypothyroidism for proteins that causally are associated  
164 with IPF and hypothyroidism, as mentioned by Yoshiji and her colleagues [8]. In brief,  
165 the effect of IRF3 on hyperthyroidism was first evaluated and then multiplied by the  
166 effect of hyperthyroidism on IPF. Following that, the proportion of the entire effect of  
167 IRF3 on IPF mediated by hyperthyroidism was calculated by dividing the  
168 hyperthyroidism-mediated effect (hyperthyroidism-to-IPF) by the overall effect  
169 (IRF3-to-IPF) [8,17].

## 170 **Results and discussion**

### 171 **Identification of causal proteins associated with clinical traits**

172 The MR analysis was used to evaluate the causal effects of 4,907 plasma proteins  
173 on 18 diseases by using *cis*-pQTLs (pQTLs that reside within a 1 Mb region around a  
174 transcription start site of a protein-coding gene) for these proteins as instrumental  
175 variables and 18 clinical traits as outcomes (**Figure 1A** and **Supplemental Table 1**).  
176 Given that *cis*-pQTLs are more likely than *trans*-pQTLs to directly alter the

177 transcription or translation of their linked gene, the likelihood of directional horizontal  
178 pleiotropy is considerably reduced [8]. Following MR analysis and stringent process  
179 filtering (**Method** and **Figure 1A**), a total of 146 plasma proteins were found for  
180 associations with 18 clinical traits (**Figure 1B** and **Supplemental Table 1**).  
181 Particularly, the causal associations were found for 12 clinical traits, including male  
182 pattern baldness (6 proteins), gastroesophageal reflux disease (15 proteins),  
183 Keratoconus (3 proteins), selective IgA deficiency disease (2 proteins), age-related  
184 hearing impairment (12 proteins), familial hyperlipidemia (8 proteins), atopic eczema  
185 (4 proteins), Brugada syndrome (1 protein), amyotrophic lateral sclerosis (1 protein),  
186 hypothyroidism (27 proteins), basal cell carcinoma (5 proteins), and prostate cancer  
187 (62 proteins). For example, a genetic tendency to elevated LYPLAL1 was linked to an  
188 increased risk of keratoconus (OR per-1-SD higher plasma protein level [95%  
189 confidence interval (CI)]=2.52[1.56, 4.06];  $p$ -value=0.00014). Higher levels of  
190 genetically predicted CRAT were linked to an increased incidence of atopic eczema  
191 (OR[95% CI]=1.63[1.27, 2.10];  $p$ -value=0.00012). Genetically determined higher  
192 SCARF2 levels were associated with a higher risk of male pattern baldness  
193 (OR[95%CI]: 1.23[1.11, 1.36];  $p$ -value=3.91e-05). It is worth noting that the  
194 causative protein that is significantly linked to one clinical trait may also be linked to  
195 other clinical traits, while this is nominally significant (**Figure 1B**). For example,  
196 THBS3, which was associated with an increased risk of gastroesophageal reflux  
197 disease (OR[95%CI]=1.31[1.15, 1.49];  $p$ -value=6.2e-05), was also linked to a higher  
198 risk of cataract (OR[95%CI]=1.014[1.003, 1.025];  $p$ -value=0.0125) and uterine  
199 fibroid (OR[95%CI]=1.32[1.05, 1.67];  $p$ -value=0.016). Furthermore, CRAT, which  
200 was linked to atopic eczema, was also associated with a higher risk of age-related  
201 hearing impairment (OR[95%CI]=1.079[1.022, 1.139];  $p$ -value=0.0059) and  
202 fibromuscular dysplasia (OR[95%CI]=3.28[1.11,9.71];  $p$ -value=0.031). These  
203 findings indicated an opportunity for existing pharmaceutical repurposing in the  
204 prevention of disease. In fact, inhibitors of interleukin-23 (IL-23) signaling, initially  
205 developed for psoriasis, have been repurposed for Crohn's disease based on GWAS  
206 that found links between genetic variants in the IL23R gene and Crohn's disease

207 [3,18,19]. Similarly, IL-17A signaling inhibitors established for psoriasis, rheumatoid  
208 arthritis, and uveitis have been investigated and approved for ankylosing spondylitis  
209 based on GWAS findings [3]. Notably, LYPLAL1, which has been connected to an  
210 increased risk of keratoconus, has also been linked to a lower risk of male pattern  
211 baldness (OR[95%CI]=0.87[0.77, 0.995];  $p$ -value=0.043) and atopic eczema  
212 (OR[95%CI]=0.74[0.60, 0.92];  $p$ -value=0.0062). These findings suggested that when  
213 repurposing drugs, it is essential to consider the potential effects caused by  
214 multiplicity.

215 Colocalization analysis was then implemented to determine whether previously  
216 identified relationships between proteins and clinical traits were driven by linkage  
217 disequilibrium (LD) (**Figure 1C**). Among the 146 causative proteins, 18 showed  
218 higher colocalization evidence (posterior probability  $PH_4 > 0.8$ ), whereas 6 showed  
219 medium colocalization evidence (posterior probability  $PH_4 > 0.7$ ) (**Figure 1D**). For  
220 example, the colocalization indicated that the genetic variations linked to CRAT,  
221 LYPLAL1, and THBS3 (*cis*-pQTLs) were caused by the same genetic variants that  
222 underpin the association with individual clinical traits (**Figure 1E**). For the other 122  
223 causative proteins, there was no colocalization evidence (posterior probability  
224  $PH_4 < 0.6$ ), indicating that the MR findings for these proteins were likely biased by  
225 LD.

## 226 **Genetically increased circulating CA12 level is associated with a reduced risk of** 227 **hypothyroidism**

228 Based on the MR and colocalization analysis results, the causative protein related  
229 to the clinical traits was sought to further examine the role they played. In the case of  
230 hypothyroidism, among the three causative proteins, a one standard deviation rise in  
231 genetically predicted CA12 levels was linked with a lower risk of hypothyroidism  
232 (OR=0.47, 95%CI 0.33-0.66,  $p$ -value=1.68e-05) (**Figure 1B**, **Figure 2A** and  
233 **Supplementary Tables 1**). To confirm the premise of a lack of directional pleiotropy,  
234 which can reintroduce confounding, we used PhenoScanner  
235 (<http://www.phenoscanter.medschl.cam.ac.uk/>) to find out whether the CA12  
236 *cis*-pQTLs were related to any characteristics or diseases at the genome-wide



237 significant threshold of  $p$ -value $<5e-08$ . The deCODE study's primary *cis*-pQTL for  
238 CA12 (rs7183733) was linked to dentures (**Supplementary Tables 1**). Indeed,  
239 employing CA12 *cis*-pQTL as exposure and dentures as outcomes, MR analysis  
240 revealed that CA12 levels were expected to impact dentures (OR=1.12, 95%CI  
241 1.08-1.16,  $p$ -value=5.59e-12) with no reverse causation ( $p$ -value=1.83e-04,  
242 MR-Steiger test). This finding implies that the association between CA12 and  
243 dentures is a case of vertical pleiotropy, which does not contradict MR explanation.  
244 GTEx v8 (<https://gtexportal.org/>), which contains expression data from 49 tissues and  
245 838 individuals, was used to investigate the tissues in which CA12 is expressed.  
246 When compared to whole blood, CA12 was highly expressed in numerous tissues,  
247 including the thyroid ( $p$ -value $<0.001$ ) (**Figure 2B**). To better understand the cell type  
248 of origin of CA12, we examined single-cell CA12 expression in human thyroid  
249 tissues from thyroidectomy patients (GSE182416, available at  
250 <https://www.ncbi.nlm.nih.gov/geo/>) [16]. CA12 was highly enriched in thyroid  
251 epithelial cells and fibroblasts in single-cell sequencing as compared to other cell  
252 types in adipose tissues ( $p$ -value $<0.001$ ) (**Figure 2C**). No difference in expression  
253 between epithelial cells and fibroblasts was found ( $p$ -value $>0.05$ ). These findings  
254 suggested that certain cell types may be accountable for local CA12 production in  
255 these tissues. Furthermore, we noticed that CA12 was considerably more expressed in  
256 older persons ( $p$ -value $<0.001$ ) (**Figure 2D**), who had a greater prevalence and  
257 incidence of hypothyroidism than young ones [20]. Taken together, these findings  
258 imply that CA12 may be an appropriate target for hypothyroidism.

259 In fact, the causative protein found in the study might be utilized to infer disease  
260 mediator associations [7]. As an example, recent research has shown that  
261 hypothyroidism has a positive causal effect on IPF [21]; however, the mechanisms  
262 underlying this association are not well understood. To evaluate the indirect effect of  
263 proteins on IPF outcomes via hypothyroidism, we performed a mediation analysis  
264 utilizing the effect estimates from two-step MR and the overall effect from primary  
265 MR. To accomplish this, the largest GWAS of IPF (2,668 cases and 8,591 controls)  
266 was extracted from a recent study [22] and three proteins (IRF3, CA12, and

267 TNFRSF1B) that have a causal effect on hypothyroidism were initially used to  
268 identify a causal effect on IPF using MR analysis, as described above. Surprisingly,  
269 only IRF3 was found to have a causal effect on IPF ( $p$ -value $<0.05/3=0.016$ ,  
270 Bonferroni-adjusted for three proteins) (OR=2.79, 95%CI 1.29-6.02,  $p$ -value=0.0088)  
271 (Figure 2E and Supplementary Tables 1). Following that, the product of coefficients  
272 method was utilized to assess the mediation effect, and 3.8% of the IRF3 mediation  
273 affect on IPF via hypothyroidism was uncovered (Figure 2F).

274 Overall, our analysis identified 18 putative causative proteins for clinical traits  
275 by integrating proteogenomics research. More research is needed to determine the  
276 viability of the 18 discovered proteins as therapeutic targets for clinical disease  
277 therapy. Furthermore, the detailed mechanism by which these proteins alter clinical  
278 traits should be explored in depth using a multi-omics approach.

### 279 **Competing interests**

280 None declared.

### 281 **Author contributions**

282 Conception and design: SF. Data analyses: SF. Manuscript writing: SF. Data  
283 acquisition: SF and MJ.

### 284 **Acknowledgments**

285 We would like to thank the IPF GWAS Collaborative Group for providing us with the  
286 IPF GWAS summary data. The authors would also like to thank the other researchers  
287 who contributed to developing the GWAS datasets utilized in this work for making  
288 them available for research purposes.

### 289 **References**

- 290 1 Henning RH & Brundel BJM. Proteostasis in cardiac health and disease. *Nat*  
291 *Rev Cardiol.* 2017;14:637-53. doi:10.1038/nrcardio.2017.89.
- 292 2 Walker KA, Chen J, Shi L, et al. Proteomics analysis of plasma from middle-aged  
293 adults identifies protein markers of dementia risk in later life. *Sci Transl Med.* 2023,  
294 15, eadf5681. doi:10.1126/scitranslmed.adf5681.
- 295 3 Trajanoska K, Bhérer C, Taliun D, et al. From target discovery to clinical drug  
296 development with human genetics. *Nature.* 2023;620:737–45.

- 297 doi:10.1038/s41586-023-06388-8.
- 298 4 Wallentin L, Eriksson N, Olszowka M, et al. Plasma proteins associated with  
299 cardiovascular death in patients with chronic coronary heart disease: A retrospective  
300 study. *PLoS Med* 2021;18:1-22. doi:10.1371/journal.pmed.1003513.
- 301 5 Ferkingstad E, Sulem P, Atlason BA, et al. Large-scale integration of the plasma  
302 proteome with genetics and disease. *Nat Genet* 2021;53:1712-21.  
303 doi:10.1038/s41588-021-00978-w.
- 304 6 Sanderson E, Glymour MM, Holmes MV, et al. Mendelian randomization. *Nat*  
305 *Rev Methods Primers* 2022; 2, 1-21. doi:10.1038/s43586-021-00092-5.
- 306 7 Chen L, Peters JE, Prins B, et al. Systematic Mendelian randomization using the  
307 human plasma proteome to discover potential therapeutic targets for stroke. *Nat*  
308 *Commun* 2022;13:1-14. doi:10.1038/s41467-022-33675-1.
- 309 8 Yoshiji S, Butler-Laporte G, Lu T, et al. Proteome-wide Mendelian randomization  
310 implicates nephronectin as an actionable mediator of the effect of obesity on  
311 COVID-19 severity. *Nat Metab* 2023;5:248-64. doi:10.1038/s42255-023-00742-w.
- 312 9 Nakanishi T, Cerani A, Forgetta V, et al. Genetically increased circulating FUT3  
313 level leads to reduced risk of idiopathic pulmonary fibrosis: A Mendelian  
314 randomisation study. *Eur Respir J* 2022;59. doi:10.1183/13993003.03979-2020.
- 315 10 King EA, Wade Davis J, Degner JF. Are drug targets with genetic support twice  
316 as likely to be approved? Revised estimates of the impact of genetic support for drug  
317 mechanisms on the probability of drug approval. *PLoS Genet* 2019;15:1-20.  
318 doi:10.1371/journal.pgen.1008489.
- 319 11 Ochoa D, Karim M, Ghossaini M, et al. Human genetics evidence supports  
320 two-thirds of the 2021 FDA-approved drugs. *Nat Rev Drug Discov* 2022;21:551.  
321 doi:10.1038/d41573-022-00120-3.
- 322 12 Yoshiji S, Lu TY, Butler-Laporte G, et al, COL6A3-derived endotrophin mediates  
323 the effect of obesity on coronary artery disease:an integrative proteogenomics analysis.  
324 *medRxiv* 2023. doi: 10.1101/2023.04.19.23288706.
- 325 13 Li SF & Gong MJ. Therapeutic targets for haemorrhoidal disease: proteome-wide  
326 Mendelian randomisation and colocalization analyses. *medRxiv* 2023.

- 327 doi:10.1101/2023.06.19.23291373.
- 328 14 Hemani G, Zheng J, Elsworth B, et al. The MR-base platform supports systematic  
329 causal inference across the human phenome. *Elife* 2018;7:1-29.  
330 doi:10.7554/eLife.34408.
- 331 15 Giambartolomei C, Vukcevic D, Schadt EE, et al. Bayesian Test for  
332 Colocalisation between Pairs of Genetic Association Studies Using Summary  
333 Statistics. *PLoS Genet* 2014;10. doi:10.1371/journal.pgen.1004383.
- 334 16 Hong Y, Kim HJ, Park S, et al. Single Cell Analysis of Human Thyroid Reveals  
335 the Transcriptional Signatures of Aging. *Endocrinol* (United States) 2023;164:1-12.  
336 doi:10.1210/endo/bqad029.
- 337 17 Carter AR, Gill D, Davies NM, et al. Understanding the consequences of  
338 education inequality on cardiovascular disease: Mendelian randomisation study. *BMJ*  
339 2019;365:1-12. doi:10.1136/bmj.11855.
- 340 18 Duerr RH, Taylor KD, Brant SR, et al. A genome-wide association study  
341 identifies IL23R as an inflammatory bowel disease gene. *Science* 2006;314:1461-3.  
342 doi:10.1126/science.1135245.
- 343 19 Burton PR, Clayton DG, Cardon LR, et al. Association scan of 14,500  
344 nonsynonymous SNPs in four diseases identifies autoimmunity variants. *Nat Genet*  
345 2007;39:1329-1337. doi: 10.1038/ng.2007.17.
- 346 20 Kim MI. Hypothyroidism in Older Adults. [Updated 2020 Jul 14]. In: Feingold KR,  
347 Anawalt B, Blackman MR, et al., editors. Endotext [Internet]. South Dartmouth (MA):  
348 MDText.com, Inc.; 2000-. Available from:  
349 <https://www.ncbi.nlm.nih.gov/books/NBK279005/>.
- 350 21 Zhang Y, Zhao M, Guo P, et al. Mendelian randomisation highlights  
351 hypothyroidism as a causal determinant of idiopathic pulmonary fibrosis.  
352 *eBioMedicine* 2021;73:103669. doi:10.1016/j.ebiom.2021.103669.
- 353 22 Allen RJ, Guillen-Guio B, Oldham JM, et al. Genome-Wide Association Study of  
354 Susceptibility to Idiopathic Pulmonary Fibrosis. *Thorax* 2022; 77(8): 829-833. doi:  
355 10.1136/thoraxjnl-2021-218577.
- 356

357 **Figure Legends**

358 **Figure 1 Mendelian randomisation and colocalization results.** (A) A diagram  
359 depicting the Mendelian randomization principle and procedure filtering for MR  
360 results. LOOA, leave-one-out analysis. (B) Shared the associations between 146  
361 causative plasma proteins (related with at least one clinical trait) and 18 clinical traits  
362 from MR analysis. For visualizing, only MR results showing no pleiotropy  
363 (MR-Egger,  $p$ -value>0.5), no heterogeneity ( $I^2$ <0.5), and true causality direction  
364 (Steiger test,  $p$ -value<0.05) were included. (C) The two mathematical models of  
365 genetic colocalization, causation, and colocalization, as well as LD confounding. (D)  
366 Scanning for colocalization evidence of causative plasma proteins with outcomes. The  
367 size of the circle represents the posterior probability for  $H_4$ , and the color of the circle  
368 represents the classification of the evidence. Red indicates high evidence for  
369 colocalization ( $PH_4$ >0.8); yellow indicates medium evidence for colocalization  
370 ( $PH_4$ >0.7); and green and black indicate moderate evidence for colocalization  
371 ( $PH_4$ <0.7). (E) The locus-compare scatter plot for the CRAT, LYPLAL1, and THBS3  
372 association signals. The findings of colocalization analyses for CRAT (left),  
373 LYPLAL1 (center), and THBS3 (right) are shown. The marked SNP represents the  
374 genetic variants used for the MR analysis.

375

376 **Figure 2 Follow-up analyses for causal proteins associated with hypothyroidism.**  
377 (A) The locus-compare scatter plot compares the quantitative trait loci (pQTL) of  
378 CA12 and the GWAS of hypothyroidism. (B) CA12 expression profile in human  
379 tissues in GTEx v8 (<https://gtexportal.org/>). CA12 expression levels were displayed  
380 on a log transcript per thousand plus one (TPM+1) scale. (C) CA12 expression  
381 patterns in human thyroid tissues from thyroidectomy patients (GSE182416,  
382 accessible at <https://www.ncbi.nlm.nih.gov/geo/>). NK cells: natural killer cells; SMCs:  
383 smooth muscle cells. (D) A dot-plot revealing the expression of CA12 in epithelial  
384 cells and fibroblasts in children and adults. (E) Forest plots for the effect of three  
385 selected proteins on IPF. (F) Mediation effects of IRF3 on IPF via hypothyroidism.  
386 For the effect of IRF3 on IPF mediated by hypothyroidism, the product of coefficients

387 method calculates the proportion mediated by multiplying  $\beta_{\text{IRF3-to-hypothyroidism}}$  and  
388  $\beta_{\text{hypothyroidism-to-IPF}}$  and subsequently dividing it by  $\beta_{\text{IRF3-to-IPF}}$ , where  $\beta_{\text{IRF3-to-hypothyroidism}}$  is  
389 the effect of IRF3 on hypothyroidism,  $\beta_{\text{hypothyroidism-to-IPF}}$  is the effect of hypothyroidism  
390 on IPF, and  $\beta_{\text{IRF3-to-IPF}}$  is the total effect of IRF3 on IPF.

391

392 **Supplementary Table 1 The summary statistics obtained in this study.**

**A**

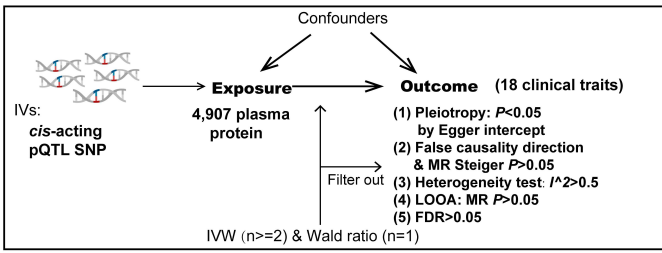

**C**

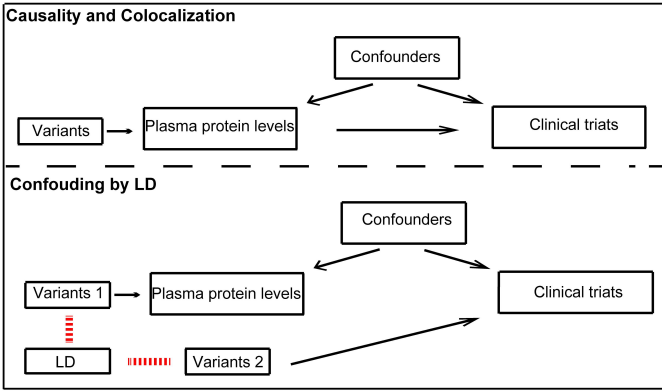

**D**

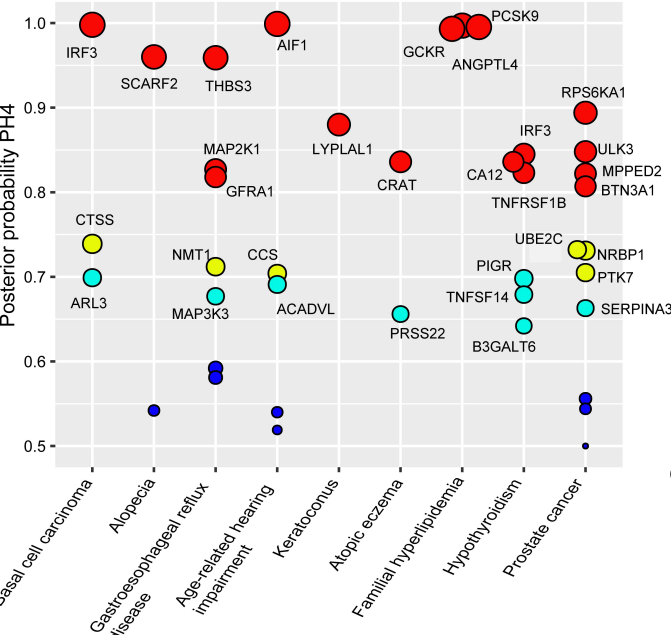

**E**

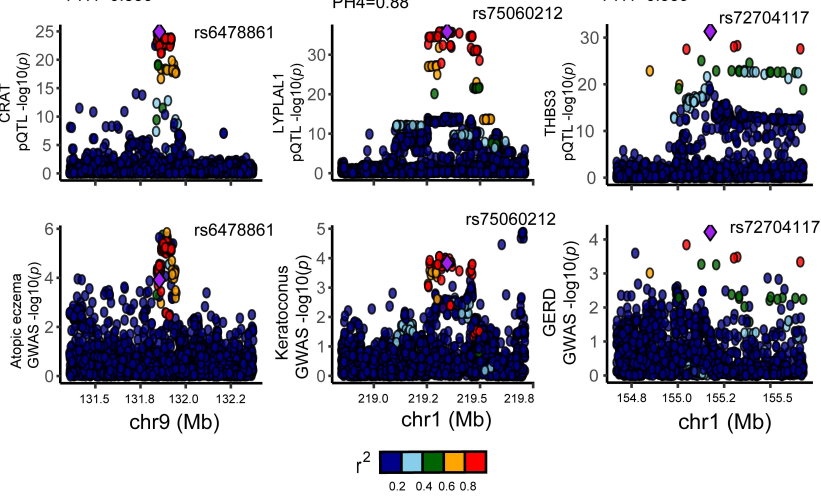

**B**

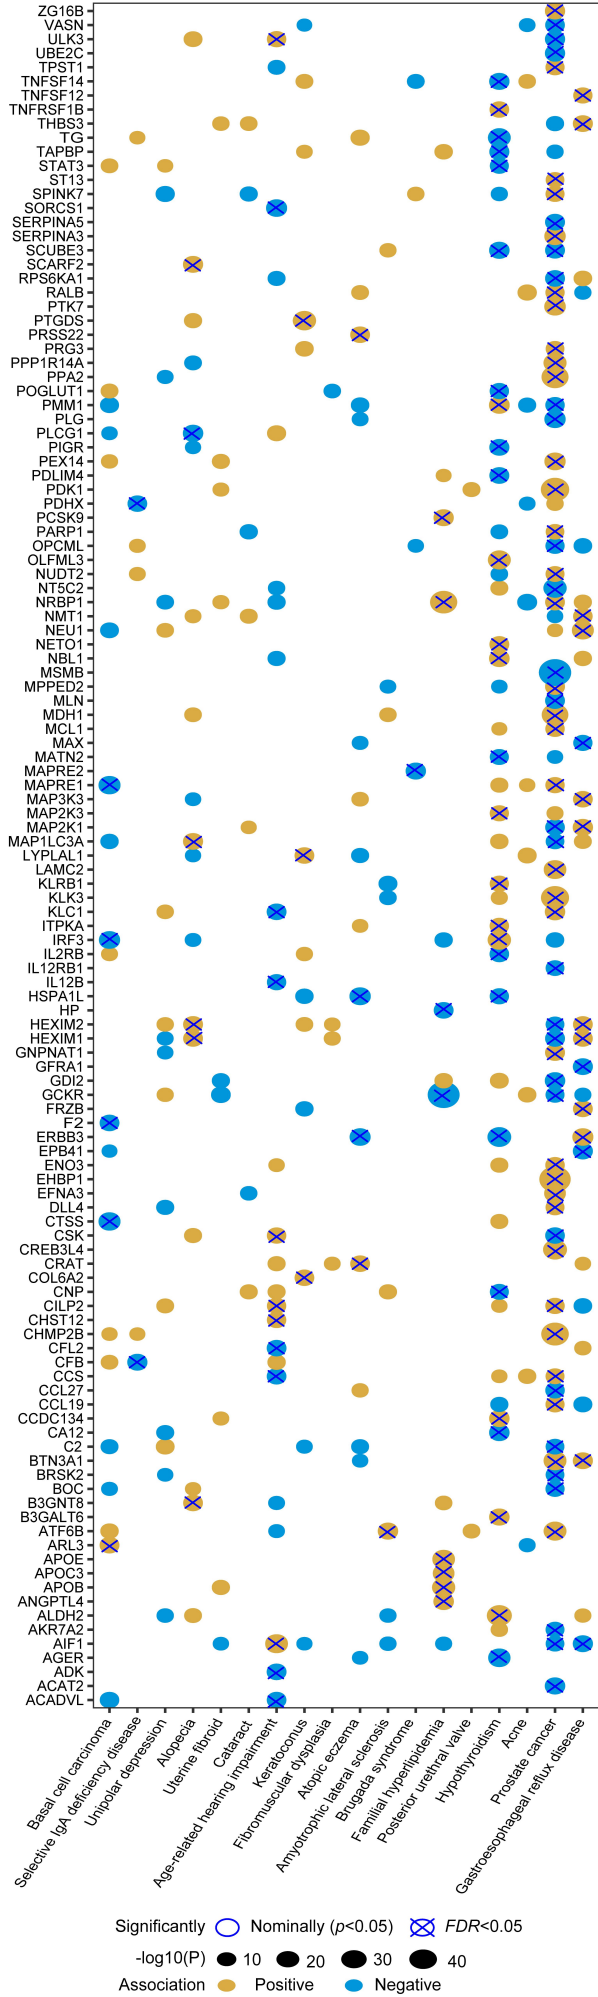

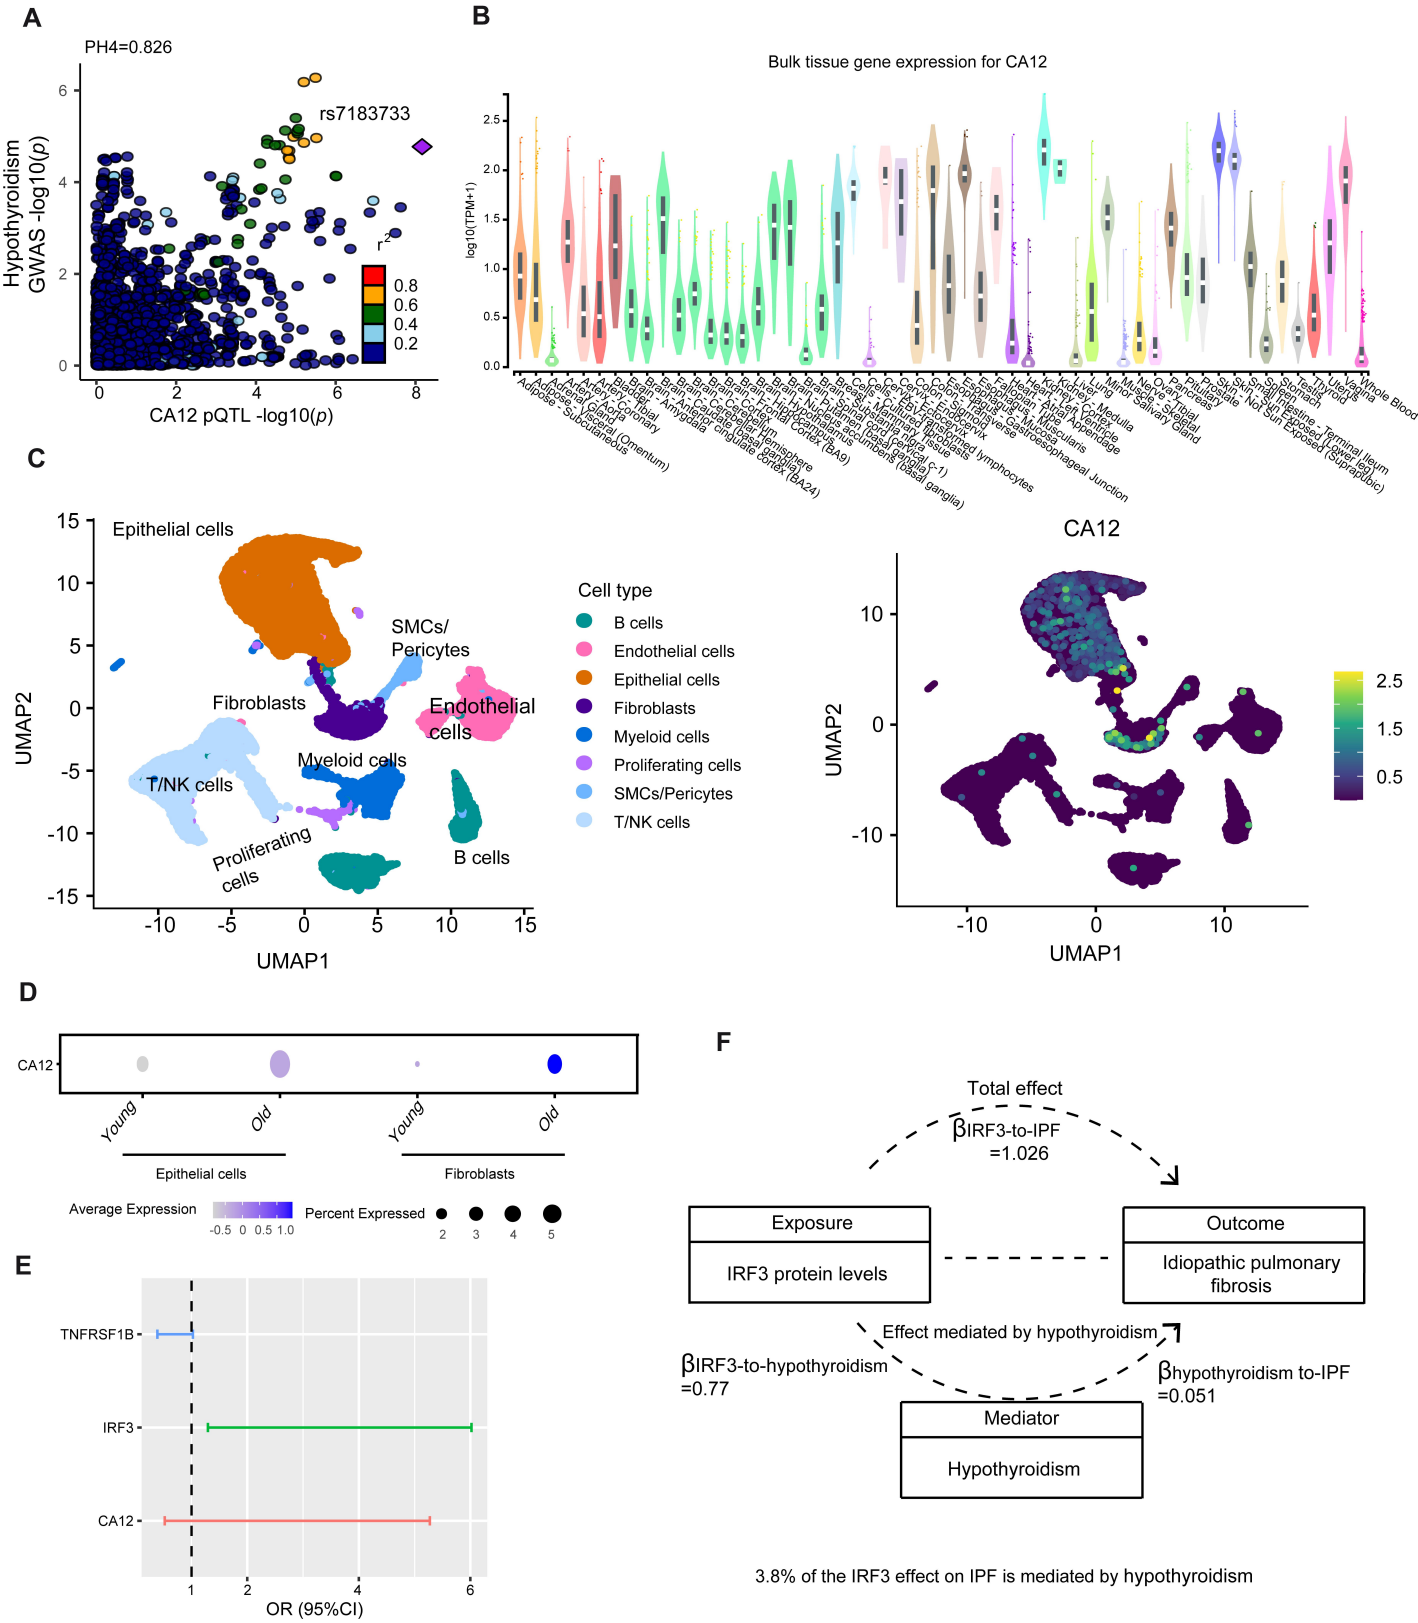

Source: https://medrxiv.org/content/medrxiv/early/2023/11/17/2023.10.23.23297376.full.pdf
